## **A zebrafish model for *Mycobacterium leprae* granulomatous infection**

Cressida A. Madigan<sup>1#</sup>, James Cameron<sup>1‡</sup>, Lalita Ramakrishnan<sup>1,2,3,4,\*</sup>

<sup>1</sup>Department of Microbiology, University of Washington, Seattle, WA 98195, USA.

<sup>2</sup>Department of Immunology, University of Washington, Seattle, WA 98195, USA.

<sup>3</sup>Department of Medicine, University of Washington, Seattle, WA 98195, USA.

<sup>4</sup>Molecular Immunity Unit, Department of Medicine, University of Cambridge, MRC Laboratory of Molecular Biology, Cambridge UK CB2 0QH, UK.

<sup>#</sup>Present address: Division of Dermatology, Department of Medicine, David Geffen School of Medicine, University of California, Los Angeles, CA, USA, 90095.

<sup>‡</sup>Present address: Environmental and Fisheries Science Division, National Oceanic and Atmospheric Administration, Seattle, WA 98115, USA.

\*Correspondence: [lr404@cam.ac.uk](mailto:lr404@cam.ac.uk)

1 **Abstract**

2 Understanding the pathogenesis of leprosy granulomas has been hindered by a  
3 paucity of tractable experimental animal models. *Mycobacterium leprae*, which  
4 causes leprosy, grows optimally at ~30°C, so we sought to model granulomatous  
5 disease in the ectothermic zebrafish. We find noncaseating granulomas develop  
6 rapidly, and eventually eradicate infection. *rag1* mutant zebrafish, which lack  
7 lymphocytes, also form noncaseating granulomas with similar kinetics, but these  
8 control infection more slowly. Our findings establish the zebrafish as a facile,  
9 genetically tractable model for leprosy, and reveal the interplay between innate  
10 and adaptive immune determinants mediating leprosy granuloma formation and  
11 function.

12

13

## 14 *Introduction*

15           Few animal models exist for the study of *M. leprae* pathogenesis *in vivo*,  
16 largely because the  $\geq 37^{\circ}\text{C}$  core temperature of traditional rodent models  
17 prevents *M. leprae* survival [1]. *M. leprae* is propagated for research use in the  
18 athymic mouse footpad [1], where they induce granuloma formation but not the  
19 neurological disease typical of human leprosy [2]. Armadillos develop  
20 neurological disease and form granulomas in response to *M. leprae*; however,  
21 they do not breed in captivity and lack most genetic, molecular and  
22 immunological tools [3]. Cultured macrophages have been used to model early  
23 granuloma formation with *M. leprae*, but the scope of this model remains limited  
24 [4]. Overall, the host determinants that mediate granuloma formation in leprosy  
25 and their role in pathogenesis are incompletely understood.

26           The zebrafish has become an effective model for studying *Mycobacterium*  
27 *tuberculosis* granulomas using *M. marinum*, the agent of fish tuberculosis, and a  
28 close genetic relative of the *M. tuberculosis* complex [5]. *M. marinum* infection of  
29 adult zebrafish results in organized, multicentric granulomas that become  
30 necrotic, similar to those of human tuberculosis [6]. Zebrafish are housed at  
31  $\sim 30^{\circ}\text{C}$ , similar to the growth optimum of *M. leprae*; indeed, a more than century-  
32 old paper reports experimental *M. leprae* infection of several fish species [7].  
33 Therefore, we explored the zebrafish as a leprosy model, with a focus on  
34 granuloma development, fate and function.

35

## 36 *Methods*

37 Zebrafish husbandry and experiments were conducted at the University of  
38 Washington in compliance with guidelines from the U.S. National Institutes of  
39 Health and approved by the University of Washington Institutional Animal Care  
40 and Use Committee. Four-month old male zebrafish, either wildtype AB strain, or  
41 sibling *rag1*<sup>t26683/t26683</sup> mutants and *rag1*<sup>+t26683</sup> heterozygotes, were infected  
42 intraperitoneally with  $5 \times 10^7$  *M. leprae* isolated from mouse footpads; bacteria  
43 were tested for viability by radiorespirometry, as described [1]. *rag1*<sup>t26683/t26683</sup>  
44 and *rag1*<sup>+t26683</sup> were identified among offspring from a *rag1*<sup>+t26683</sup> incross by  
45 genotyping using high-resolution melt analysis of amplicons generated with  
46 primers GCGCTATGAGATCTGGAGGA and TGCAGTGCATCCAGAGTAGG, or  
47 GCGCTATGAGATCTGGAGGA and CAGAGTAGGCTGGGTTTCCA, on a CFX  
48 Connect Thermocycler (BioRad). Animals were observed twice daily and killed  
49 by tricaine overdose for each experimental time point, or in the survival  
50 experiment, if they appeared moribund. Sections were prepared for histology as  
51 described [6]. Briefly, serial sagittal sections were made from formalin-fixed  
52 animals and stained by hematoxylin and eosin to visualize host cells, and using  
53 Fite, a modified acid-fast stain to visualize *M. leprae* which are acid fast bacilli  
54 (AFB). Sections were examined using bright field microscopy and images were  
55 collected with a digital photo camera (model DKC-5000; Sony, Tokyo, Japan)  
56 and produced using Metamorph software (Molecular Devices Corporation,  
57 Sunnyvale, CA). Three fish per group per time point were examined. As a  
58 surrogate for bacterial burden per fish, Tissue Studio 4.0 (Definiens) was used to  
59 identify the AFB-positive regions in a single sagittal section, and measure their

60 cumulative area. Animals were considered to have cleared infection if no AFB  
61 were detected in the entire sagittal section. Statistical analyses were performed  
62 using Prism (version 5.0a, GraphPad).

63

## 64 *Results*

65  $5 \times 10^7$  *M. leprae* were injected into zebrafish, similar to the number of  
66 bacteria used to inoculate mouse footpads [1]. Within seven days post infection  
67 (dpi) with *M. leprae*, zebrafish had formed organized granulomas throughout the  
68 body involving the pancreas, liver, intestine, mesentery, gonad and adipose  
69 tissue (figure 1A). The granulomas were comprised centrally of macrophages  
70 that had undergone epithelioid transformation (characterized by a high cytoplasm  
71 to nucleus ratio), with scattered lymphocytes (characterized by a high nucleus to  
72 cytoplasm ratio) aggregating at the periphery (figure 1A). Thus, even from this  
73 early stage, they resembled the organized granulomas of human leprosy (figure  
74 1B). Fite staining revealed that similar-sized granulomas within the same fish  
75 contained varying numbers of bacteria, possibly reflecting ongoing bacterial  
76 killing (figure 1C and D).

77 We sought to determine the role of adaptive immunity in the control of  
78 leprosy. For tuberculosis, the critical role of adaptive immunity in the control of  
79 infection is highlighted by the role of human immunodeficiency virus (HIV)  
80 infection in increasing susceptibility to TB [8]. *rag1* mutant mice lacking mature T  
81 and B cells are hypersusceptible to *M. tuberculosis* [5]. Likewise, SCID mice,  
82 also lacking mature T and B cells, have increased *M. leprae* burdens in their

83 footpads, which decreases upon administration of T cells to the animals [9].  
84 However, the role of adaptive immunity in the control of human leprosy is  
85 unclear. On the one hand, lymphocytes are present in the well-organized  
86 granulomas of paucibacillary leprosy, similar to the case with human TB  
87 granulomas, and an effective cellular response is associated with paucibacillary  
88 leprosy [5, 10]. On the other hand, the evidence that HIV infection exacerbates  
89 leprosy in humans is scant, with only isolated reports of increased tendency for  
90 multibacillary disease, reactions, and relapse [11].

91 We previously showed that *rag1* mutant zebrafish are more susceptible to  
92 *M. marinum*, recapitulating the findings of *rag1* mutant mice infected with *M.*  
93 *tuberculosis* [5, 6]. Therefore, we asked if *rag1* mutant zebrafish were also more  
94 susceptible to *M. leprae*. We compared them to their heterozygous siblings,  
95 which are as resistant as wildtype fish to *M. marinum* [6]. By ~60 dpi, the infected  
96 mutants had become runted with frayed fins (figure 2A) and began to die soon  
97 after (figure 2B). Decreased survival was statistically significant in the infected  
98 *rag1* mutants but not the other groups (figure 2B), and all dying animals  
99 manifested similar signs of disease before death (runting, frayed fins,  
100 hemorrhaging, and swimming near the tank bottom). Only 3 of 12 infected  
101 mutants survived, and these survivors appeared healthy, suggesting some  
102 mutants were able to clear infection.

103 Simultaneously, in a separate small cohort (three *rag1* heterozygote and  
104 three mutant animals per time point), we performed tissue histology to assess  
105 granuloma morphology and bacterial burdens. *rag1* mutants formed organized

106 epithelioid granulomas by seven days that were similar to wildtype except that,  
107 as expected, they lacked lymphocytes (figures 2C). Analysis of Fite-stained  
108 histology sections suggested that both heterozygotes and mutants cleared  
109 infection over time. At 112 dpi and 168 dpi, two of three *rag1* heterozygotes  
110 contained no bacilli, while one of three *rag1* mutants contained no bacilli at those  
111 time points (figure 2D). Quantification of bacterial burdens in the remaining fish  
112 showed that mutant bacterial burdens were greater than heterozygotes at 28  
113 days but then declined (figure 2D). Together, these findings suggest that *M.*  
114 *leprae* can be controlled by zebrafish without adaptive immunity.

115         A curious feature of *M. leprae* granulomas is that they seldom become  
116 necrotic, even when laden with organisms [10]; this is in sharp contrast to human  
117 tuberculous granulomas [5]. In the zebrafish too, we found that even  
118 multibacillary lesions where individual macrophages were packed with bacteria  
119 seldom became necrotic (figure S1A). Necrosis was observed in only 2.9% of  
120 heterozygote granulomas (1 of 34 granulomas in 12 animals) (figure S1B).  
121 Similarly, only a minority of the *rag1* mutant granulomas became necrotic – 14%,  
122 or 7 of 50 granulomas in 12 animals; this difference was not statistically  
123 significant.

124         Finally, human leprosy granulomas are frequently associated with damage  
125 to peripheral nerves. We were unable to assess nerve damage in this study, as  
126 even an experienced neuropathologist was unable to identify the nerves in these  
127 small animals. In a companion study using zebrafish larvae, which are

128 transparent, we have been able to show the association between early  
129 macrophage aggregates and nerve injury (Madigan et al., submitted).

130

### 131 *Discussion*

132 This pilot study already suggests that the adult zebrafish will be an  
133 excellent model for studying *M. leprae* granuloma formation and function, and the  
134 immune pathways that determine host susceptibility to leprosy. Morphologically,  
135 the granulomas resemble those of paucibacillary (or tuberculoid) human leprosy,  
136 and like their human counterparts, they are effective in controlling infection [13].  
137 Indeed, the vast majority of humans appear to clear *M. leprae* infection [13], and  
138 the zebrafish do as well.

139 Another intriguing feature of human leprosy is the rarity of granuloma  
140 necrosis [10], and this too is preserved in the zebrafish. This could be because  
141 *M. leprae* has lost determinants present in *M. marinum* and *M. tuberculosis* that  
142 promote granuloma macrophage necrosis.

143 Finally, our work reveals the complexity of the interplay between innate  
144 and adaptive immunity in the control of leprosy. In separate work, we have  
145 developed the larval zebrafish as a leprosy model, and we find that macrophages  
146 can aggregate into granulomas and control *M. leprae* to a substantial extent in  
147 the sole context of innate immunity (Madigan et al., submitted). Our findings  
148 here with the *rag1* mutant reinforce the idea that bona fide epithelioid granulomas  
149 form without adaptive immunity [5], yet the full microbicidal capacity of the  
150 granuloma macrophages requires stimulation by adaptive immunity. Indeed, we



151 find that lymphocytes begin to arrive in the granuloma by seven days after  
152 infection, and bacterial burdens diverge between *rag1* heterozygotes and  
153 mutants by 28 days (figure 2D). Thereafter, bacterial burdens drop even in the  
154 *rag1* mutant fish, suggesting that innate immune factors can gradually control  
155 infection (figure 2D). The finding that mutants slowly reduce bacterial burdens,  
156 and occasionally even clear infection, suggests that innate immunity alone may  
157 be sufficient to control this slowly growing pathogen. The decreased survival of  
158 *rag1* mutants in the face of this delayed control may reflect the adverse  
159 consequences of chronic infection, or be due to cytokine dysregulation in the  
160 absence of adaptive immunity. In any case, our zebrafish findings may reflect the  
161 lack of an obvious link between exacerbation of leprosy and HIV co-infection [11].  
162 Moreover, given that innate immunity has a role in clearing infection, the  
163 development in humans of multibacillary rather than paucibacillary leprosy may  
164 well reflect innate immune deficiencies, some of which are beginning to be  
165 identified [10, 15]. It is our hope that these can be broadly identified and studied  
166 in the zebrafish, using the publicly available libraries of zebrafish mutants have  
167 been generated by chemical mutagenesis and CRISPR technologies [16].

168

## 169 **Acknowledgements**

170 Live *M. leprae* was provided by the HHS/HRSA/HSB/National Hansen's  
171 Disease Program, Baton Rouge, LA., with financial support from NIAID IAA-2646.  
172 We thank Christine Cosma for advice on and technical assistance with zebrafish  
173 infections, Paul Edelstein for discussions, advice on histology preparations and

174 statistics, Robert Modlin for advice on histology analysis, Philip Scumpia for  
175 advice on histology interpretation, and Paul Edelstein and Robert Modlin for  
176 manuscript review. This work was supported by an NIH T32 AI1007411 and an  
177 NIH NRSA postdoctoral fellowship AI104240 (C.A.M.), and NIH R37AI054503  
178 and the NIH Director's Pioneer Award (L.R.). C.A.M. is an A.P. Giannini  
179 Foundation Postdoctoral Fellow and L.R. is a Wellcome Trust Principal Research  
180 Fellow.

181

182 **Conflict of interest statement: all authors declare no conflict of interest.**

183

#### 184 **Figure Legends**

185 **Figure 1.** Adult zebrafish are susceptible to *M. leprae* infection. Panel A shows a  
186 hematoxylin and eosin (H&E) section of a granuloma in a wildtype adult  
187 zebrafish, 7 days post infection (dpi) with  $5 \times 10^7$  Thai53 strain *M. leprae*.  
188 Arrowheads indicate lymphocyte nuclei. In panel B, a granuloma from a human  
189 tuberculoid leprosy patient; Archives of Lauro de Souza Lima Institute. In panel  
190 C, a serial section of the granuloma in A, stained for acid-fast bacilli (AFB) to  
191 detect *M. leprae*; many bacteria are present (arrows). In panel D, an AFB-stained  
192 granuloma section from a similarly infected fish at 7 dpi; few bacteria are present.  
193 Arrows indicate bacilli. 10 $\mu$ m bars.

194

195 **Figure 2.** Adaptive immunity contributes to control of *M. leprae* infection. In panel  
196 A, representative images of sibling uninfected and infected *rag1* mutant animals

197 ~100 days after infection; the *M. leprae*-infected animal is smaller than the  
198 uninfected animal. Arrows indicate an intact fin in the uninfected animal and a  
199 frayed fin in the infected animal. In panel B, Kaplan-Meier survival curve of  
200 sibling *rag1* heterozygote and mutant zebrafish, infected or not with *M. leprae* as  
201 in figure 1A. Number of animals: 61 uninfected heterozygotes, 20 infected  
202 heterozygotes, 57 uninfected mutants, 41 infected mutants. In panel C, an H&E-  
203 stained section through a *rag1* mutant zebrafish granuloma, infected as in figure  
204 1A; 10µm bar. In panel D, quantification of bacterial burden per fish in *rag1*  
205 heterozygotes and mutants; \*p=0.03, other comparisons not significant; student's  
206 T test comparing heterozygotes to mutants at each time point.

207

208 **Supplemental Figure 1.** Few *M. leprae* granulomas undergo necrosis. In panel  
209 A, an AFB-stained section of a non-necrotizing granuloma in a *rag1* heterozygote  
210 zebrafish with heavily infected macrophages (arrows). In panel B, AFB and H&E  
211 sections of a necrotic granuloma observed in *M. leprae*-infected *rag1*  
212 heterozygote fish. 10µm bars.

213

214

215

#### References

- 216 1. Truman, R.W. and J.L. Krahenbuhl, *Viable M. leprae as a research reagent.*  
217 *International Journal of Leprosy and Other Mycobacterial Diseases*, 2001.  
218 **69**(1): p. 1-12.
- 219 2. Job, C., et al., *Electron Microscopic Appearance of Lepromatous Foodpads of*  
220 *Nude Mice.* *International Journal of Leprosy and Other Mycobacterial*  
221 *Diseases*, 2003. **71**(3): p. 231-239.
- 222 3. Sharma, R., et al., *The armadillo: a model for the neuropathy of leprosy and*  
223 *potentially other neurodegenerative diseases.* *Disease Models and*  
224 *Mechanisms*, 2013. **6**(1): p. 19-24.
- 225 4. Wang, H., et al., *An in vitro model of Mycobacterium leprae-induced granuloma*  
226 *formation.* *BMC Infectious Diseases*, 2013. **13**(1): p. 279.

- 227 5. Ramakrishnan, L., *Revisiting the role of the granuloma in tuberculosis*. Nat Rev  
228 Immunol, 2012. **12**(5): p. 352-366.
- 229 6. Swaim, L.E., et al., *Mycobacterium marinum Infection of Adult Zebrafish Causes*  
230 *Caseating Granulomatous Tuberculosis and Is Moderated by Adaptive*  
231 *Immunity*. Infection and Immunity, 2006. **74**(11): p. 6108-6117.
- 232 7. Couret, M., *The behavior of bacillus leprae in coldblooded animals*. Journal of  
233 Experimental Medicine, 1911. **13**: p. 576-589.
- 234 8. Kwan, C.K. and J.D. Ernst, *HIV and Tuberculosis: a Deadly Human Syndemic*.  
235 Clinical Microbiology Reviews, 2011. **24**(2): p. 351-376.
- 236 9. Azouaou, N., et al., *Reconstitution of Mycobacterium leprae immunity in severe*  
237 *combined immunodeficient mice using a T-cell line*. International Journal of  
238 Leprosy and Other Mycobacterial Diseases, 1993. **61**(3): p. 398-405.
- 239 10. Renault, C.A. and J.D. Ernst, *Mycobacterium leprae (Leprosy)*, in *Mandell,*  
240 *Douglas, and Bennett's Infectious Disease Essentials*, J.E. Bennett, R. Dolin, and  
241 M.J. Blaser, Editors. 2017, Elsevier: Philadelphia, PA. p. 371.
- 242 11. Lockwood, D.N.J. and S.M. Lambert, *Human Immunodeficiency Virus and*  
243 *Leprosy: An Update*. Dermatologic Clinics, 2011. **29**(1): p. 125-128.
- 244 12. Madigan, C., et al., *A macrophage response to Mycobacterium leprae phenolic*  
245 *glycolipid initiates nerve damage in leprosy*. submitted.
- 246 13. Lara, C. and J. Nolasco, *Self-healing, or abortive, and residual forms of*  
247 *childhood leprosy and their probable significance*. International Journal of  
248 Leprosy and Other Mycobacterial Diseases, 1956. **24**(3): p. 245-263.
- 249 14. Yang, D., et al., *Mycobacterium leprae-Infected Macrophages Preferentially*  
250 *Primed Regulatory T Cell Responses and Was Associated with Lepromatous*  
251 *Leprosy*. PLOS Neglected Tropical Diseases, 2016. **10**(1): p. e0004335.
- 252 15. Tobin, D.M., et al., *The Ita4h Locus Modulates Susceptibility to Mycobacterial*  
253 *Infection in Zebrafish and Humans*. Cell. **140**(5): p. 717-730.
- 254 16. Varshney, G.K., R. Sood, and S.M. Burgess, *Chapter One - Understanding and*  
255 *Editing the Zebrafish Genome*, in *Advances in Genetics*, J.C.D. Theodore  
256 Friedmann and F.G. Stephen, Editors. 2015, Academic Press. p. 1-52.
- 257

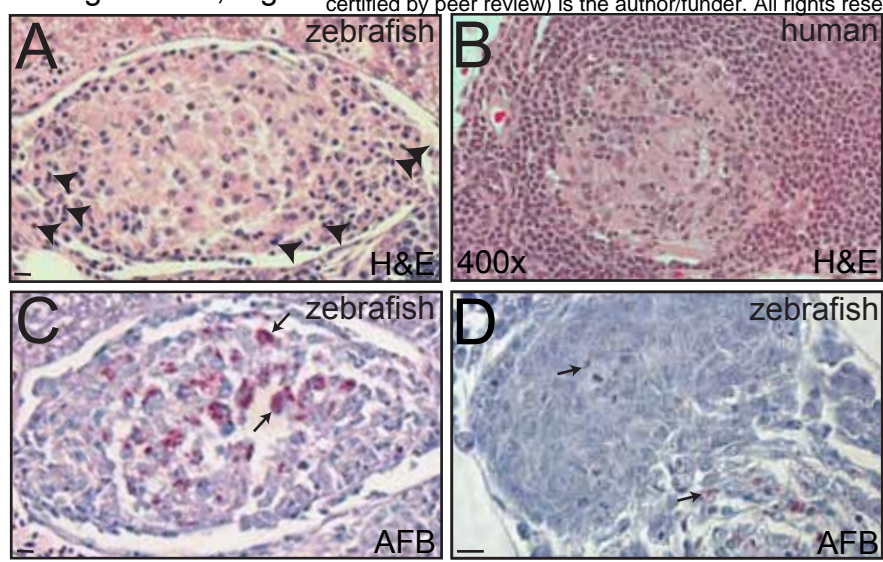

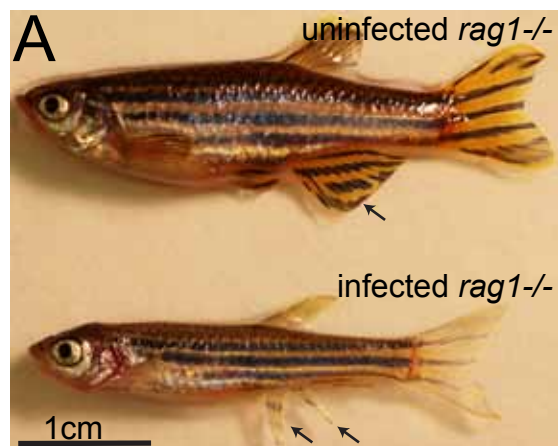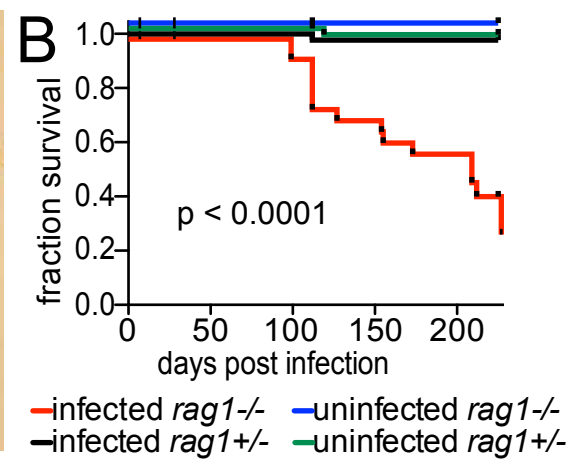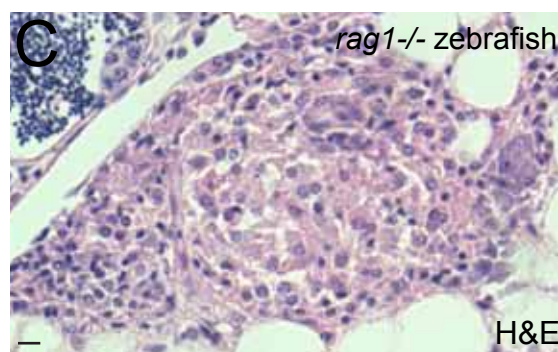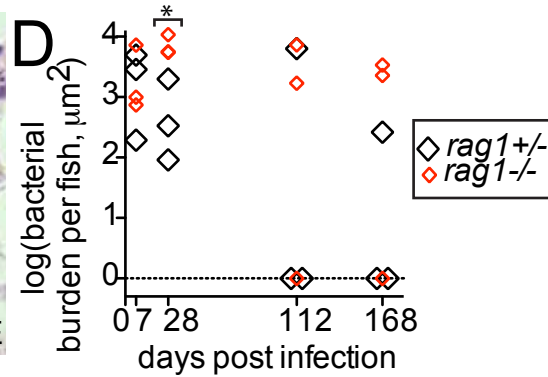

Source: http://www.biorxiv.org/content/10.1101/127639v1.full.pdf
